# Supplementary material
Source: Springer Nature journal article supplement (https://www.springermedizin.de/resource/supplementary/12903_2011_201_MOESM11_ESM.pdf/9516364)
Supplement: MOESM11 [file 9516364]

**Table 3**

| Genera                      | H                        |         | U                        |         | Metastats<br><i>p</i> -value | Metastats<br><i>q</i> -value |
|-----------------------------|--------------------------|---------|--------------------------|---------|------------------------------|------------------------------|
|                             | mean<br>abundance<br>(%) | std.err | mean<br>abundance<br>(%) | std.err |                              |                              |
| Streptococcus               | 22.47%                   | 1.91%   | 14.32%                   | 1.98%   | 0.010989                     | 0.0043                       |
| Veillonella                 | 8.62%                    | 1.90%   | 2.33%                    | 0.77%   | 0.002997                     | 0.0016                       |
| Prevotella                  | 6.07%                    | 1.75%   | 1.27%                    | 0.44%   | 0.004995                     | 0.0023                       |
| Lautropia                   | 5.67%                    | 2.00%   | 1.33%                    | 0.31%   | 0.013986                     | 0.0051                       |
| Haemophilus                 | 4.15%                    | 1.39%   | 0.58%                    | 0.21%   | 0.000999                     | 0.0008                       |
| Leptotrichia                | 4.12%                    | 0.91%   | 12.48%                   | 2.44%   | 0.002997                     | 0.001644                     |
| Selenomonas                 | 1.73%                    | 0.36%   | 6.71%                    | 1.70%   | 0.002997                     | 0.001644                     |
| Uncultured_Lachnospiraceae* | 1.00%                    | 0.27%   | 1.97%                    | 0.25%   | 0.015984                     | 0.0056366                    |
| Eubacterium                 | 0.34%                    | 0.08%   | 1.89%                    | 0.34%   | 0.000999                     | 0.000822                     |
| Cardiobacterium             | 0.60%                    | 0.17%   | 1.19%                    | 0.22%   | 0.038961                     | 0.011658                     |
| Peptostreptococcus          | 0.19%                    | 0.10%   | 1.42%                    | 0.46%   | 0.002997                     | 0.001644                     |
| Tannerella                  | 0.20%                    | 0.05%   | 1.36%                    | 0.49%   | 0.000999                     | 0.000822                     |
| Catonella                   | 0.36%                    | 0.10%   | 1.06%                    | 0.25%   | 0.006993                     | 0.003139                     |
| Synergistes                 | 0.07%                    | 0.03%   | 1.22%                    | 0.49%   | 0.001998                     | 0.001409                     |
| Filifactor                  | 0.05%                    | 0.04%   | 0.96%                    | 0.28%   | 0.000999                     | 0.000822                     |
| Peptococcus                 | 0.12%                    | 0.04%   | 0.49%                    | 0.11%   | 0.004995                     | 0.002349                     |
| Solobacterium               | 0.11%                    | 0.03%   | 0.46%                    | 0.22%   | 0.048951                     | 0.01381                      |
| SR1                         | 0.11%                    | 0.04%   | 0.42%                    | 0.08%   | 0.000999                     | 0.000822                     |
| Syntrophomonas              | 0.00%                    | 0.00%   | 0.17%                    | 0.07%   | 0.000999                     | 0.000822                     |
| Johnsonella                 | 0.01%                    | 0.01%   | 0.14%                    | 0.05%   | 0.000999                     | 0.000822                     |
| Choroflexus                 | 0.01%                    | 0.01%   | 0.12%                    | 0.07%   | 0.030969                     | 0.010172                     |
| Olsenella                   | 0.01%                    | 0.00%   | 0.05%                    | 0.02%   | 0.041958                     | 0.012185                     |
| Propionivibrio              | 0.00%                    | 0.00%   | 0.05%                    | 0.02%   | 0.032967                     | 0.010172                     |
| Peptoniphilus               | 0.00%                    | 0.00%   | 0.04%                    | 0.02%   | 0.000999                     | 0.000822                     |
| Desulfomicrobium            | 0.00%                    | 0.00%   | 0.02%                    | 0.01%   | 0.000999                     | 0.000822                     |
| Pseudoramibacter            | 0.00%                    | 0.00%   | 0.02%                    | 0.01%   | 0.000999                     | 0.000822                     |

\* Not a genus.
